# Supplementary material for: Fungal and bacterial communities of ‘Pinot noir’ must: effects of vintage, growing region, climate, and basic must chemistry
Source: PeerJ journal article supplement (doi:10.7717/peerj.10836), 2021-02-04

**A**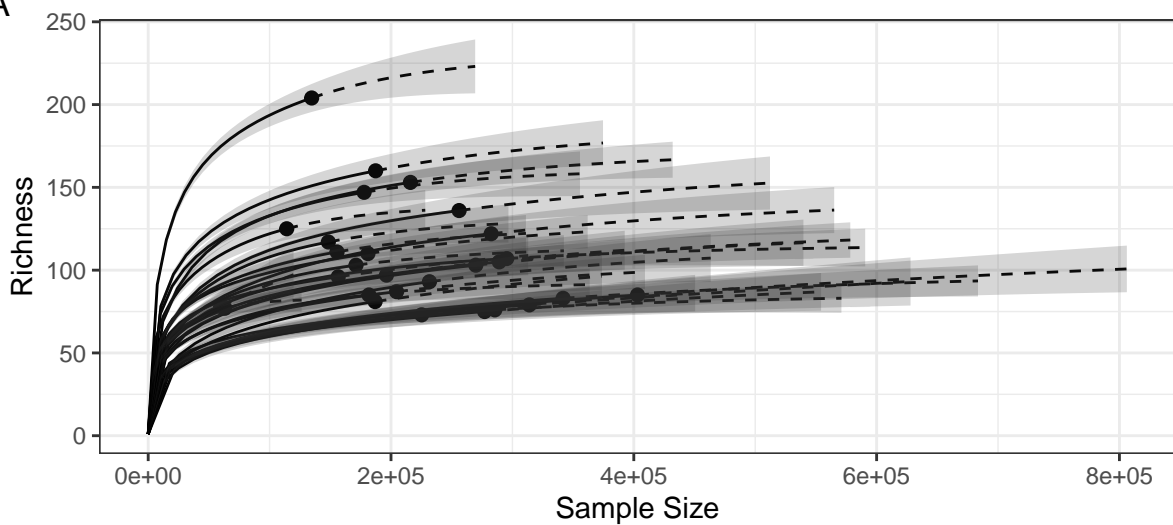**B**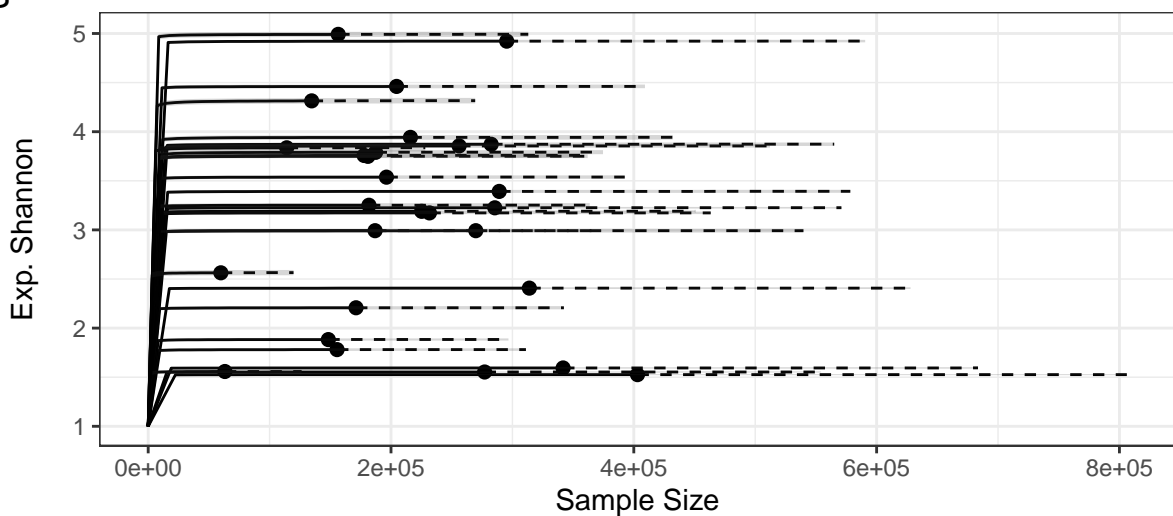**C**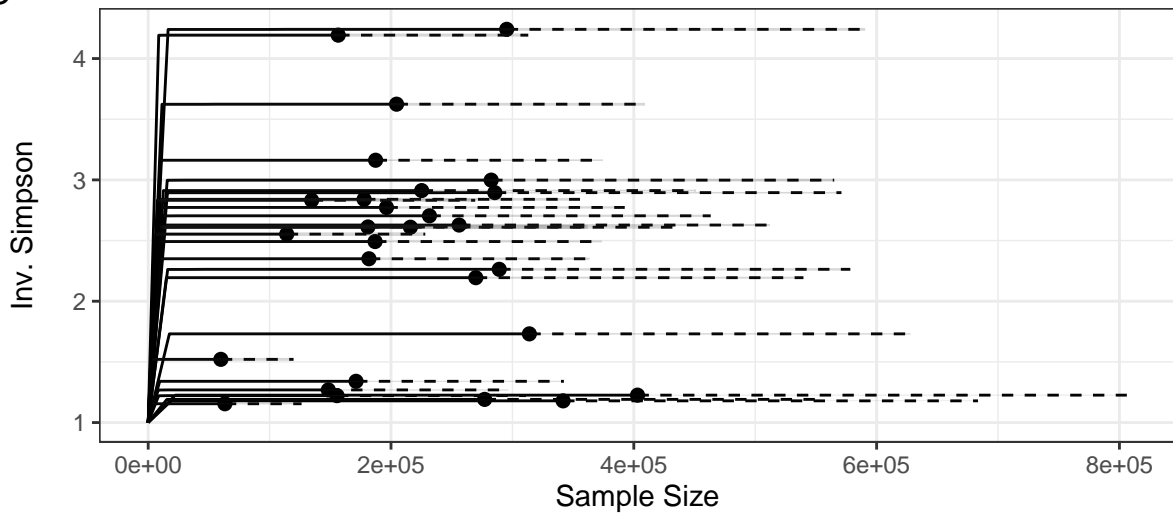

Supplement: FigureS2StaffRL.pdf [file FigureS2StaffRL.pdf]
