# Supplementary material for: Fungal and bacterial communities of ‘Pinot noir’ must: effects of vintage, growing region, climate, and basic must chemistry
Source: PeerJ. 2021 Feb 4;9:e10836. doi: 10.7717/peerj.10836 (PMC7868071; doi:10.7717/peerj.10836)
Supplement: Supplemental Information 3 — Core bacterial ASVs, defined as having mean abundances above 0.01% in at least 90% of samples, calculated over (A) the entire dataset, (B) the 2016 vintage, and (C) the 2017 vintage. (D) contains variable taxa, defined as having mean abundances above 1% in between 5% and 90% of samples. [file peerj-09-10836-s003.xls]

## Sheet: metadata
Tab details
A: Bacterial taxonomy and abundance quantiles of ASVs with mean abundances greater than 0.01% in at least 90% of samples, calculated over the entire dataset
B: Bacterial taxonomy and abundance quantiles of ASVs with mean abundances greater than 0.01% in at least 90% of samples, calculated for 2016 samples
B: Bacterial taxonomy and abundance quantiles of ASVs with mean abundances greater than 0.01% in at least 90% of samples, calculated for 2017 samples
D: Bacterial taxonomy and abundance quantiles of ASVs with mean abundances greater than 1% in between 5% and 90% of samples
Source: Kerri L Steenwerth, Ian A. Morelan, Ruby J. Stahel, Thien P. Nguyen, Rosa Figueroa, Dario Cantu, Jungmin Lee, Ron C. Runnebaum, Amisha T. Poret-Peterson. Fungal and bacterial communities of ‘Pinot noir’ must vary across vintage and growing region. Peer J, submitted 8/2020.

## Sheet: A core_all
ASV	Domain	Phylum	Class	Order	Family	Genus	0	25	50	75	100
ASV_3	Bacteria	Proteobacteria	Gammaproteobacteria	Enterobacteriales	Enterobacteriaceae	Tatumella	0.00282391	0.0481502	0.387814	0.603812	0.956653
ASV_6	Bacteria	Proteobacteria	Alphaproteobacteria	Acetobacterales	Acetobacteraceae	Gluconobacter	0.000144556	0.000776493	0.0024032	0.0268288	0.259751
ASV_8	Bacteria	Proteobacteria	Gammaproteobacteria	Betaproteobacteriales	Burkholderiaceae	Massilia	6.48144e-05	0.00114336	0.0198452	0.130988	0.35919
ASV_14	Bacteria	Proteobacteria	Alphaproteobacteria	Sphingomonadales	Sphingomonadaceae	Sphingomonas	0.000172439	0.00167654	0.0105594	0.0261399	0.193284
ASV_16	Bacteria	Proteobacteria	Gammaproteobacteria	Enterobacteriales	Enterobacteriaceae	f__Enterobacteriaceae_ASV_16	6.35301e-05	0.000261881	0.000660758	0.00135981	0.0208976
ASV_17	Bacteria	Proteobacteria	Gammaproteobacteria	Enterobacteriales	Enterobacteriaceae	f__Enterobacteriaceae_ASV_17	0.000231685	0.00126484	0.00289018	0.013117	0.227791
ASV_20	Bacteria	Proteobacteria	Alphaproteobacteria	Acetobacterales	Acetobacteraceae	Komagataeibacter	4.96467e-05	0.000190337	0.000663064	0.00535551	0.1546
ASV_23	Bacteria	Proteobacteria	Gammaproteobacteria	Pseudomonadales	Pseudomonadaceae	Pseudomonas	5.89922e-05	0.00424292	0.0148628	0.0292724	0.0839624
ASV_24	Bacteria	Proteobacteria	Gammaproteobacteria	Enterobacteriales	Enterobacteriaceae	f__Enterobacteriaceae_ASV_24	0.000154287	0.00762377	0.0145851	0.0306193	0.107695
ASV_25	Bacteria	Proteobacteria	Gammaproteobacteria	Pseudomonadales	Pseudomonadaceae	Pseudomonas	1.36136e-05	0.000922101	0.00218257	0.0148472	0.255044
ASV_32	Bacteria	Proteobacteria	Gammaproteobacteria	Pseudomonadales	Pseudomonadaceae	Pseudomonas	4.53786e-05	0.000982958	0.0028393	0.0185106	0.0956
ASV_33	Bacteria	Proteobacteria	Gammaproteobacteria	Enterobacteriales	Enterobacteriaceae	f__Enterobacteriaceae_ASV_33	0.000145212	0.00295986	0.00719349	0.0148498	0.0521261
ASV_37	Bacteria	Proteobacteria	Gammaproteobacteria	Enterobacteriales	Enterobacteriaceae	Lonsdalea	4.12008e-05	0.000380093	0.0014217	0.00322441	0.178653
ASV_39	Bacteria	Proteobacteria	Gammaproteobacteria	Enterobacteriales	Enterobacteriaceae	f__Enterobacteriaceae_ASV_39	3.20651e-05	0.000774114	0.002146	0.00670621	0.0395022
ASV_45	Bacteria	Proteobacteria	Gammaproteobacteria	Enterobacteriales	Enterobacteriaceae	Escherichia/Shigella	7.26058e-05	0.000976076	0.00233439	0.0062283	0.0421078
ASV_47	Bacteria	Proteobacteria	Gammaproteobacteria	Enterobacteriales	Enterobacteriaceae	f__Enterobacteriaceae_ASV_47	0	0.000912435	0.00182262	0.00446479	0.0226712
ASV_76	Bacteria	Actinobacteria	Actinobacteria	Micrococcales	Microbacteriaceae	f__Microbacteriaceae_ASV_76	6.35301e-05	0.000429614	0.000918922	0.0033195	0.00986971
ASV_86	Bacteria	Proteobacteria	Alphaproteobacteria	Sphingomonadales	Sphingomonadaceae	Sphingomonas	1.36136e-05	0.000193414	0.000545335	0.00154965	0.00503662

## Sheet: B core_2016
ASV	Domain	Phylum	Class	Order	Family	Genus	0	25	50	75	100
ASV_3	Bacteria	Proteobacteria	Gammaproteobacteria	Enterobacteriales	Enterobacteriaceae	Tatumella	0.0127768	0.283823	0.520762	0.780817	0.956653
ASV_6	Bacteria	Proteobacteria	Alphaproteobacteria	Acetobacterales	Acetobacteraceae	Gluconobacter	0.000144556	0.000788181	0.00168336	0.00354868	0.141157
ASV_8	Bacteria	Proteobacteria	Gammaproteobacteria	Betaproteobacteriales	Burkholderiaceae	Massilia	6.48144e-05	0.000188203	0.000571029	0.014386	0.0685299
ASV_14	Bacteria	Proteobacteria	Alphaproteobacteria	Sphingomonadales	Sphingomonadaceae	Sphingomonas	0.000977001	0.00345943	0.0106715	0.0148785	0.172566
ASV_16	Bacteria	Proteobacteria	Gammaproteobacteria	Enterobacteriales	Enterobacteriaceae	f__Enterobacteriaceae_ASV_16	0.000123056	0.000181203	0.000601639	0.00069757	0.00294361
ASV_17	Bacteria	Proteobacteria	Gammaproteobacteria	Enterobacteriales	Enterobacteriaceae	f__Enterobacteriaceae_ASV_17	0.00127848	0.00351464	0.00794329	0.0274825	0.227791
ASV_20	Bacteria	Proteobacteria	Alphaproteobacteria	Acetobacterales	Acetobacteraceae	Komagataeibacter	0.000144771	0.000233237	0.000686342	0.00531529	0.00827586
ASV_23	Bacteria	Proteobacteria	Gammaproteobacteria	Pseudomonadales	Pseudomonadaceae	Pseudomonas	0.00173467	0.00453858	0.00834775	0.0269389	0.0521223
ASV_24	Bacteria	Proteobacteria	Gammaproteobacteria	Enterobacteriales	Enterobacteriaceae	f__Enterobacteriaceae_ASV_24	0.000942108	0.00849816	0.0141949	0.0283978	0.107695
ASV_25	Bacteria	Proteobacteria	Gammaproteobacteria	Pseudomonadales	Pseudomonadaceae	Pseudomonas	0.000244854	0.000966417	0.00132862	0.0103095	0.0189032
ASV_32	Bacteria	Proteobacteria	Gammaproteobacteria	Pseudomonadales	Pseudomonadaceae	Pseudomonas	9.0009e-05	0.00183641	0.00268603	0.00507492	0.0279053
ASV_33	Bacteria	Proteobacteria	Gammaproteobacteria	Enterobacteriales	Enterobacteriaceae	f__Enterobacteriaceae_ASV_33	0.000578225	0.00339403	0.00726981	0.0196135	0.0521261
ASV_35	Bacteria	Proteobacteria	Gammaproteobacteria	Enterobacteriales	Enterobacteriaceae	f__Enterobacteriaceae_ASV_35	0	0.000452362	0.000877588	0.00126028	0.0548348
ASV_37	Bacteria	Proteobacteria	Gammaproteobacteria	Enterobacteriales	Enterobacteriaceae	Lonsdalea	0.000103864	0.000441552	0.00104716	0.0031216	0.0113559
ASV_39	Bacteria	Proteobacteria	Gammaproteobacteria	Enterobacteriales	Enterobacteriaceae	f__Enterobacteriaceae_ASV_39	0.000389489	0.000785214	0.00204446	0.00661274	0.0243183
ASV_42	Bacteria	Proteobacteria	Gammaproteobacteria	Pseudomonadales	Pseudomonadaceae	Pseudomonas	8.97245e-05	0.00162226	0.00354254	0.00553803	0.025205
ASV_44	Bacteria	Proteobacteria	Alphaproteobacteria	Acetobacterales	Acetobacteraceae	Gluconobacter	1.99388e-05	0.000325888	0.000373987	0.00102983	0.00206648
ASV_45	Bacteria	Proteobacteria	Gammaproteobacteria	Enterobacteriales	Enterobacteriaceae	Escherichia/Shigella	0.000304067	0.000998315	0.00170465	0.00906016	0.0175681
ASV_46	Bacteria	Proteobacteria	Gammaproteobacteria	Pseudomonadales	Moraxellaceae	Acinetobacter	2.16048e-05	0.000302005	0.00212552	0.00320874	0.0375029
ASV_47	Bacteria	Proteobacteria	Gammaproteobacteria	Enterobacteriales	Enterobacteriaceae	f__Enterobacteriaceae_ASV_47	0.000104679	0.00146271	0.0022325	0.00536462	0.0226712
ASV_55	Bacteria	Proteobacteria	Gammaproteobacteria	Pseudomonadales	Moraxellaceae	Acinetobacter	0.000124617	0.000315032	0.00070642	0.00375928	0.0644256
ASV_58	Bacteria	Proteobacteria	Gammaproteobacteria	Enterobacteriales	Enterobacteriaceae	Tatumella	0.000177127	0.00102682	0.00162016	0.00246743	0.00292438
ASV_60	Bacteria	Proteobacteria	Alphaproteobacteria	Acetobacterales	Acetobacteraceae	Komagataeibacter	0.000378837	0.00162868	0.00309375	0.00628171	0.0207064
ASV_64	Bacteria	Proteobacteria	Gammaproteobacteria	Enterobacteriales	Enterobacteriaceae	f__Enterobacteriaceae_ASV_64	7.78978e-05	0.000590531	0.00147933	0.00353285	0.0354254
ASV_67	Bacteria	Proteobacteria	Gammaproteobacteria	Oceanospirillales	Halomonadaceae	Zymobacter	0.00010134	0.000218381	0.000562595	0.00413296	0.0362286
ASV_69	Bacteria	Proteobacteria	Alphaproteobacteria	Sphingomonadales	Sphingomonadaceae	Sphingomonas	5.76128e-05	0.000747974	0.00175518	0.00277845	0.0328866
ASV_73	Bacteria	Proteobacteria	Gammaproteobacteria	Xanthomonadales	Xanthomonadaceae	Stenotrophomonas	7.97552e-05	0.00086443	0.00208126	0.00441044	0.00706692
ASV_75	Bacteria	Proteobacteria	Alphaproteobacteria	Acetobacterales	Acetobacteraceae	Komagataeibacter	8.47398e-05	0.00024128	0.000456029	0.00129893	0.00326679
ASV_76	Bacteria	Actinobacteria	Actinobacteria	Micrococcales	Microbacteriaceae	f__Microbacteriaceae_ASV_76	0.000239265	0.000595157	0.000784975	0.0029171	0.00646291
ASV_80	Bacteria	Proteobacteria	Alphaproteobacteria	Acetobacterales	Acetobacteraceae	Komagataeibacter	0.000114648	0.000810719	0.00117423	0.00152867	0.0061668
ASV_81	Bacteria	Proteobacteria	Gammaproteobacteria	Pseudomonadales	Pseudomonadaceae	Pseudomonas	8.68627e-05	0.000436763	0.000969395	0.00272068	0.0423956
ASV_83	Bacteria	Proteobacteria	Gammaproteobacteria	Enterobacteriales	Enterobacteriaceae	f__Enterobacteriaceae_ASV_83	2.49235e-05	0.000498645	0.000926536	0.00205364	0.00805808
ASV_86	Bacteria	Proteobacteria	Alphaproteobacteria	Sphingomonadales	Sphingomonadaceae	Sphingomonas	0.000154526	0.000200184	0.000427543	0.00188748	0.0036817
ASV_90	Bacteria	Proteobacteria	Alphaproteobacteria	Acetobacterales	Acetobacteraceae	Acetobacter	3.98776e-05	0.000275065	0.000577151	0.000720072	0.00500907
ASV_92	Bacteria	Proteobacteria	Alphaproteobacteria	Acetobacterales	Acetobacteraceae	Kozakia	0.000194443	0.000951519	0.00171309	0.00231097	0.0101633
ASV_97	Bacteria	Proteobacteria	Alphaproteobacteria	Caulobacterales	Caulobacteraceae	Brevundimonas	0.00023398	0.000396088	0.000908808	0.00159414	0.0165517
ASV_99	Bacteria	Proteobacteria	Alphaproteobacteria	Sphingomonadales	Sphingomonadaceae	Sphingomonas	7.92176e-05	0.000590423	0.000884692	0.00151307	0.00232305
ASV_119	Bacteria	Proteobacteria	Alphaproteobacteria	Acetobacterales	Acetobacteraceae	Acetobacter	8.97245e-05	0.000631838	0.000764053	0.00120328	0.00646098
ASV_122	Bacteria	Firmicutes	Bacilli	Lactobacillales	Lactobacillaceae	Lactobacillus	3.98776e-05	0.000275065	0.00045123	0.000935921	0.00448722
ASV_123	Bacteria	Firmicutes	Bacilli	Lactobacillales	Leuconostocaceae	Oenococcus	8.97245e-05	0.00050696	0.00068377	0.00218094	0.00297641

## Sheet: C core_2017
ASV	Domain	Phylum	Class	Order	Family	Genus	0	25	50	75	100
ASV_3	Bacteria	Proteobacteria	Gammaproteobacteria	Enterobacteriales	Enterobacteriaceae	Tatumella	0.00282391	0.0232917	0.0677586	0.49488	0.899618
ASV_6	Bacteria	Proteobacteria	Alphaproteobacteria	Acetobacterales	Acetobacteraceae	Gluconobacter	0.000475312	0.00076944	0.00543704	0.0531358	0.259751
ASV_8	Bacteria	Proteobacteria	Gammaproteobacteria	Betaproteobacteriales	Burkholderiaceae	Massilia	0.00133413	0.0543944	0.116843	0.31382	0.35919
ASV_14	Bacteria	Proteobacteria	Alphaproteobacteria	Sphingomonadales	Sphingomonadaceae	Sphingomonas	0.000172439	0.00163889	0.0104473	0.0468758	0.193284
ASV_17	Bacteria	Proteobacteria	Gammaproteobacteria	Enterobacteriales	Enterobacteriaceae	f__Enterobacteriaceae_ASV_17	0.000231685	0.000450775	0.0015018	0.00376499	0.0195564
ASV_23	Bacteria	Proteobacteria	Gammaproteobacteria	Pseudomonadales	Pseudomonadaceae	Pseudomonas	5.89922e-05	0.00280217	0.018448	0.0416201	0.0839624
ASV_24	Bacteria	Proteobacteria	Gammaproteobacteria	Enterobacteriales	Enterobacteriaceae	f__Enterobacteriaceae_ASV_24	0.000154287	0.00743397	0.0191981	0.0314506	0.0647786
ASV_25	Bacteria	Proteobacteria	Gammaproteobacteria	Pseudomonadales	Pseudomonadaceae	Pseudomonas	1.36136e-05	0.000929606	0.00323629	0.0407492	0.255044
ASV_31	Bacteria	Proteobacteria	Alphaproteobacteria	Rhodobacterales	Rhodobacteraceae	Paracoccus	0.000358491	0.00651835	0.0153185	0.0464564	0.078997
ASV_32	Bacteria	Proteobacteria	Gammaproteobacteria	Pseudomonadales	Pseudomonadaceae	Pseudomonas	4.53786e-05	0.000408879	0.00337597	0.0224498	0.0956
ASV_33	Bacteria	Proteobacteria	Gammaproteobacteria	Enterobacteriales	Enterobacteriaceae	f__Enterobacteriaceae_ASV_33	0.000145212	0.00265618	0.00711717	0.0131235	0.0166784
ASV_37	Bacteria	Proteobacteria	Gammaproteobacteria	Enterobacteriales	Enterobacteriaceae	Lonsdalea	4.12008e-05	0.000468229	0.00175117	0.00334262	0.178653
ASV_38	Bacteria	Proteobacteria	Alphaproteobacteria	Rhizobiales	Hyphomicrobiaceae	Hyphomicrobium	0.000272272	0.00522376	0.0093944	0.0261256	0.044981
ASV_39	Bacteria	Proteobacteria	Gammaproteobacteria	Enterobacteriales	Enterobacteriaceae	f__Enterobacteriaceae_ASV_39	3.20651e-05	0.000690154	0.00224753	0.0057779	0.0395022
ASV_45	Bacteria	Proteobacteria	Gammaproteobacteria	Enterobacteriales	Enterobacteriaceae	Escherichia/Shigella	7.26058e-05	0.00153616	0.00244924	0.00517155	0.0421078
ASV_47	Bacteria	Proteobacteria	Gammaproteobacteria	Enterobacteriales	Enterobacteriaceae	f__Enterobacteriaceae_ASV_47	0	0.000866587	0.00124845	0.00231689	0.0131798
ASV_50	Bacteria	Proteobacteria	Gammaproteobacteria	Betaproteobacteriales	Burkholderiaceae	Massilia	9.07573e-05	0.00334114	0.00707376	0.0175223	0.0229187
ASV_71	Bacteria	Proteobacteria	Gammaproteobacteria	Enterobacteriales	Enterobacteriaceae	f__Enterobacteriaceae_ASV_71	4.53786e-06	0.000272685	0.000625544	0.00226256	0.0147837
ASV_86	Bacteria	Proteobacteria	Alphaproteobacteria	Sphingomonadales	Sphingomonadaceae	Sphingomonas	1.36136e-05	0.000194748	0.000870322	0.0013678	0.00503662

## Sheet: D variable_all
ASV	Domain	Phylum	Class	Order	Family	Genus	0	25	50	75	100
ASV_21	Bacteria	Firmicutes	Bacilli	Lactobacillales	Lactobacillaceae	Lactobacillus	2.72978e-05	9.76292e-05	0.000187867	0.000428514	0.21719
ASV_26	Bacteria	Proteobacteria	Alphaproteobacteria	Acetobacterales	Acetobacteraceae	Gluconobacter	0	3.13665e-05	0.000179166	0.00118225	0.0798397
ASV_29	Bacteria	Proteobacteria	Alphaproteobacteria	Acetobacterales	Acetobacteraceae	Gluconobacter	0	6.28071e-05	0.000386328	0.00494013	0.028525
ASV_31	Bacteria	Proteobacteria	Alphaproteobacteria	Rhodobacterales	Rhodobacteraceae	Paracoccus	0	2.50344e-05	0.000649952	0.0170595	0.078997
ASV_35	Bacteria	Proteobacteria	Gammaproteobacteria	Enterobacteriales	Enterobacteriaceae	f__Enterobacteriaceae_ASV_35	0	0.000129401	0.000516765	0.00111363	0.0548348
ASV_36	Bacteria	Proteobacteria	Gammaproteobacteria	Pseudomonadales	Moraxellaceae	Acinetobacter	0	8.92224e-05	0.000289828	0.0012989	0.0666495
ASV_38	Bacteria	Proteobacteria	Alphaproteobacteria	Rhizobiales	Hyphomicrobiaceae	Hyphomicrobium	0	2.31289e-05	0.000432033	0.0110125	0.044981
ASV_42	Bacteria	Proteobacteria	Gammaproteobacteria	Pseudomonadales	Pseudomonadaceae	Pseudomonas	1.49821e-05	0.00102876	0.001871	0.00411748	0.025205
ASV_43	Bacteria	Proteobacteria	Gammaproteobacteria	Pseudomonadales	Pseudomonadaceae	Pseudomonas	0	6.11631e-06	0.000125615	0.00135051	0.156238
ASV_50	Bacteria	Proteobacteria	Gammaproteobacteria	Betaproteobacteriales	Burkholderiaceae	Massilia	0	7.9442e-05	0.00112754	0.00772494	0.0229187
ASV_52	Bacteria	Proteobacteria	Gammaproteobacteria	Oceanospirillales	Halomonadaceae	Zymobacter	0	5.29371e-05	0.00039325	0.00145	0.0676868
ASV_53	Bacteria	Proteobacteria	Gammaproteobacteria	Diplorickettsiales	Diplorickettsiaceae	Rickettsiella	0	0	1.58008e-05	0.000110635	0.0272794
ASV_55	Bacteria	Proteobacteria	Gammaproteobacteria	Pseudomonadales	Moraxellaceae	Acinetobacter	3.65833e-05	0.000181359	0.000355539	0.00183859	0.0644256
ASV_57	Bacteria	Actinobacteria	Actinobacteria	Micrococcales	Intrasporangiaceae	Janibacter	0	0.00015746	0.000939612	0.00399783	0.0248558
ASV_60	Bacteria	Proteobacteria	Alphaproteobacteria	Acetobacterales	Acetobacteraceae	Komagataeibacter	2.26893e-05	0.00039438	0.00172972	0.00374379	0.0207064
ASV_63	Bacteria	Proteobacteria	Gammaproteobacteria	Betaproteobacteriales	Burkholderiaceae	Massilia	0	0.000159432	0.000567911	0.00204155	0.0116678
ASV_64	Bacteria	Proteobacteria	Gammaproteobacteria	Enterobacteriales	Enterobacteriaceae	f__Enterobacteriaceae_ASV_64	0	0.000160239	0.00135083	0.00356234	0.0354254
ASV_67	Bacteria	Proteobacteria	Gammaproteobacteria	Oceanospirillales	Halomonadaceae	Zymobacter	0	0.000129391	0.000444354	0.0017651	0.0362286
ASV_69	Bacteria	Proteobacteria	Alphaproteobacteria	Sphingomonadales	Sphingomonadaceae	Sphingomonas	4.53786e-06	0.00038441	0.000845255	0.00279164	0.0328866
ASV_74	Bacteria	Proteobacteria	Gammaproteobacteria	Diplorickettsiales	Diplorickettsiaceae	f__Diplorickettsiaceae_ASV_74	0	0	4.69732e-05	0.000404704	0.0346255
ASV_82	Bacteria	Proteobacteria	Gammaproteobacteria	Xanthomonadales	Xanthomonadaceae	Stenotrophomonas	1.36136e-05	0.000127299	0.000659043	0.00282216	0.0210141
ASV_88	Bacteria	Proteobacteria	Gammaproteobacteria	Betaproteobacteriales	Burkholderiaceae	Burkholderia-Caballeronia-Paraburkholderia	0	1.75486e-05	0.000239321	0.00185265	0.0293951
ASV_89	Bacteria	Proteobacteria	Alphaproteobacteria	Acetobacterales	Acetobacteraceae	Gluconacetobacter	0	4.20267e-05	0.000299151	0.00122868	0.0198911
ASV_90	Bacteria	Proteobacteria	Alphaproteobacteria	Acetobacterales	Acetobacteraceae	Acetobacter	1.12366e-05	0.000213629	0.00059886	0.0016969	0.0214641
ASV_92	Bacteria	Proteobacteria	Alphaproteobacteria	Acetobacterales	Acetobacteraceae	Kozakia	0	0.000223816	0.000551083	0.00171906	0.0101633
