# Supplementary material for: Fungal and bacterial communities of ‘Pinot noir’ must: effects of vintage, growing region, climate, and basic must chemistry
Source: PeerJ. 2021 Feb 4;9:e10836. doi: 10.7717/peerj.10836 (PMC7868071; doi:10.7717/peerj.10836)
Supplement: Supplemental Information 4 — Core fungal ASVs, defined as having mean abundances above 0.01% in at least 90% of samples, calculated over (A) the entire dataset, (B) the 2016 vintage, and (C) the 2017 vintage. (D) contains variable taxa, defined as having mean abundances above 1% in between 5% and 90% of samples. [file peerj-09-10836-s004.xls]

## Sheet: metadata
Tab details
A: Fungal taxonomy and abundance quantiles of ASVs with mean abundances greater than 0.01% in at least 90% of samples, calculated over the entire dataset
B: Fungal taxonomy and abundance quantiles of ASVs with mean abundances greater than 0.01% in at least 90% of samples, calculated for 2016 samples
B: Fungal taxonomy and abundance quantiles of ASVs with mean abundances greater than 0.01% in at least 90% of samples, calculated for 2017 samples
D : Fungal taxonomy and abundance quantiles ASVs with mean abundances greater than 1% in between 5% and 90% of samples
Source: Kerri L Steenwerth, Ian A. Morelan, Ruby J. Stahel, Thien P. Nguyen, Rosa Figueroa, Dario Cantu, Jungmin Lee, Ron C. Runnebaum, Amisha T. Poret-Peterson. Fungal and bacterial communities of ‘Pinot noir’ must vary across vintage and growing region. Peer J, submitted 8/2020.

## Sheet: A core_all_its
ASV	Kingdom	Phylum	Class	Order	Family	Genus	Species	0	25	50	75	100
ASV_1	k__Fungi	p__Ascomycota	c__Saccharomycetes	o__Saccharomycetales	f__Saccharomycodaceae	g__Hanseniaspora	s__uvarum	0.00721816	0.293297	0.454279	0.582668	0.920374
ASV_2	k__Fungi	p__Ascomycota	c__Saccharomycetes	o__Saccharomycetales	f__Saccharomycodaceae	g__Hanseniaspora	s__uvarum	0.00177288	0.0399379	0.13766	0.23656	0.499379
ASV_3	k__Fungi	p__Ascomycota	c__Saccharomycetes	o__Saccharomycetales	f__Saccharomycodaceae	g__Hanseniaspora	s__uvarum	0.000293611	0.000730399	0.00260344	0.167073	0.862677
ASV_4	k__Fungi	p__Ascomycota	c__Saccharomycetes	o__Saccharomycetales	f__Saccharomycodaceae	g__Hanseniaspora	s__uvarum	0.000479924	0.0110253	0.0971492	0.205732	0.492798

## Sheet: B core_2016_its
ASV	Kingdom	Phylum	Class	Order	Family	Genus	Species	0	25	50	75	100
ASV_1	k__Fungi	p__Ascomycota	c__Saccharomycetes	o__Saccharomycetales	f__Saccharomycodaceae	g__Hanseniaspora	s__uvarum	0.249664	0.377544	0.55371	0.617166	0.920374
ASV_2	k__Fungi	p__Ascomycota	c__Saccharomycetes	o__Saccharomycetales	f__Saccharomycodaceae	g__Hanseniaspora	s__uvarum	0.0204675	0.114354	0.214407	0.271718	0.499379
ASV_3	k__Fungi	p__Ascomycota	c__Saccharomycetes	o__Saccharomycetales	f__Saccharomycodaceae	g__Hanseniaspora	s__uvarum	0.000433095	0.000561846	0.000760997	0.00467399	0.222465
ASV_4	k__Fungi	p__Ascomycota	c__Saccharomycetes	o__Saccharomycetales	f__Saccharomycodaceae	g__Hanseniaspora	s__uvarum	0.000479924	0.0708942	0.112531	0.189566	0.492798
ASV_9	k__Fungi	p__Ascomycota	c__Saccharomycetes	o__Saccharomycetales	f__Saccharomycodaceae	g__Hanseniaspora	s__uvarum	0.000569774	0.00101395	0.00144596	0.00184915	0.00266852
ASV_11	k__Fungi	p__Ascomycota	c__Saccharomycetes	o__Saccharomycetales	f__Saccharomycodaceae	g__Hanseniaspora	s__uvarum	0.000704357	0.000861094	0.0013796	0.00178616	0.00256611
ASV_16	k__Fungi	p__Ascomycota	c__Saccharomycetes	o__Saccharomycetales	f__Saccharomycodaceae	g__Hanseniaspora	s__uvarum	0.000448912	0.000799951	0.00119182	0.00131479	0.00207162
ASV_19	k__Fungi	p__Ascomycota	c__Saccharomycetes	o__Saccharomycetales	f__Saccharomycodaceae	g__Hanseniaspora	s__uvarum	0.000332368	0.000796393	0.00095276	0.00123401	0.00179657
ASV_23	k__Fungi	p__Ascomycota	c__Saccharomycetes	o__Saccharomycetales	f__Saccharomycodaceae	g__Hanseniaspora	s__uvarum	0.000348792	0.000677666	0.000909657	0.00103923	0.00129915
ASV_25	k__Fungi	p__Ascomycota	c__Dothideomycetes	o__Pleosporales	f__Pleosporaceae	g__Alternaria		9.25909e-05	0.000289599	0.000441631	0.000721288	0.00204169
ASV_31	k__Fungi	p__Ascomycota	c__Saccharomycetes	o__Saccharomycetales	f__Saccharomycodaceae	g__Hanseniaspora	s__uvarum	0.000159709	0.000276083	0.000441237	0.000508277	0.000716873

## Sheet: C core_2017_its
ASV	Kingdom	Phylum	Class	Order	Family	Genus	Species	0	25	50	75	100
ASV_1	k__Fungi	p__Ascomycota	c__Saccharomycetes	o__Saccharomycetales	f__Saccharomycodaceae	g__Hanseniaspora	s__uvarum	0.00721816	0.187292	0.37327	0.532472	0.904079
ASV_2	k__Fungi	p__Ascomycota	c__Saccharomycetes	o__Saccharomycetales	f__Saccharomycodaceae	g__Hanseniaspora	s__uvarum	0.00177288	0.0243268	0.0476197	0.211593	0.315936
ASV_3	k__Fungi	p__Ascomycota	c__Saccharomycetes	o__Saccharomycetales	f__Saccharomycodaceae	g__Hanseniaspora	s__uvarum	0.000293611	0.00135684	0.0205306	0.443321	0.862677
ASV_4	k__Fungi	p__Ascomycota	c__Saccharomycetes	o__Saccharomycetales	f__Saccharomycodaceae	g__Hanseniaspora	s__uvarum	0.00113838	0.00657871	0.013499	0.212545	0.323226
ASV_5	k__Fungi	p__Ascomycota	c__Saccharomycetes	o__Saccharomycetales	f__Saccharomycodaceae	g__Hanseniaspora	s__uvarum	4.80454e-05	0.0003821	0.00108245	0.0163973	0.317821

## Sheet: D variable_all_its
ASV	Kingdom	Phylum	Class	Order	Family	Genus	Species	0	25	50	75	100
ASV_5	k__Fungi	p__Ascomycota	c__Saccharomycetes	o__Saccharomycetales	f__Saccharomycodaceae	g__Hanseniaspora	s__uvarum	4.24743e-05	8.76635e-05	0.000309158	0.00204666	0.317821
ASV_6	k__Fungi	p__Ascomycota	c__Leotiomycetes	o__Erysiphales	f__Erysiphaceae	g__Erysiphe	s__necator	0	1.74494e-05	0.000322616	0.00731875	0.930019
ASV_7	k__Fungi	p__Ascomycota	c__Saccharomycetes	o__Saccharomycetales	f__Saccharomycetaceae	g__Lachancea	s__quebecensis	0	0.000111243	0.000562829	0.00792583	0.0472412
