# Supplementary material for: Fungal and bacterial communities of ‘Pinot noir’ must: effects of vintage, growing region, climate, and basic must chemistry
Source: PeerJ. 2021 Feb 4;9:e10836. doi: 10.7717/peerj.10836 (PMC7868071; doi:10.7717/peerj.10836)
Supplement: Supplemental Information 5 — Vector-fitting results describing associations between (A) bacterial and (B) fungal NMDS coordinates and total soluble solids, pH, titratable acidity, elevation, growing degree days, and growing season precipitation. [file peerj-09-10836-s005.xlsx]

## Sheet: metadata
Tab details
A: NMDS ordination was conducted on bacterial Bray-Curtis values. Variables were fit to ordination and association was tested for significance using a permutation test implemented by the R function vegan::envfit.
B: NMDS ordination was conducted on fungal Bray-Curtis values. Variables were fit to ordination and association was tested for significance using a permutation test implemented by the R function vegan::envfit.
Source: Kerri L Steenwerth, Ian A. Morelan, Ruby J. Stahel, Thien P. Nguyen, Rosa Figueroa, Dario Cantu, Jungmin Lee, Ron C. Runnebaum, Amisha T. Poret-Peterson. Fungal and bacterial communities of ‘Pinot noir’ must vary across vintage and growing region. Peer J, submitted 8/2020.

## Sheet: A 16s
Vector	R2	P
Total soluble solids	0.22	0.037
pH	0.37	0.003
Titratable acidity	0.31	0.009
Elevation	0.11	0.226
Growing degree days	0.1	0.277
Growing season precipitation	0.48	0.0009

## Sheet: B ITS
Vector	R2	P
Total soluble solids	0.18	0.086
pH	0.06	0.441
Titratable acidity	0.12	0.205
Elevation	0.12	0.206
Growing degree days	0.34	0.005
Growing season precipitation	0.5	0.001
