# Supplementary material for: Fungal and bacterial communities of ‘Pinot noir’ must: effects of vintage, growing region, climate, and basic must chemistry
Source: PeerJ. 2021 Feb 4;9:e10836. doi: 10.7717/peerj.10836 (PMC7868071; doi:10.7717/peerj.10836)
Supplement: Supplemental Information 6 — Beta binomial regression coefficients, standard errors, t-values, p-values, and q-values for (A) bacterial and (B) fungal genera significantly associated with vintage, growing season precipitation, titratable acidity, pH, and total soluble solids. [file peerj-09-10836-s006.xls]

## Sheet: metadata
Tab details
A: Bacterial beta-binomial regression coefficients, standard errors, t-values, p-values, and FDR-corrected q-values as estimated by the R package corncob. Analysis was conducted at the genus level; only those with mean abundances with above 0.1% were included.
B: Bacterial beta-binomial regression coefficients, standard errors, t-values, p-values, and FDR-corrected q-values as estimated by the R package corncob. Analysis was conducted at the genus level; only those with mean abundances with above 0.1% were included.
See 'corncob' as in Martin BD, Witten D, Willis AD. 2019. Modeling microbial abundances and dysbiosis with beta-binomial regression. arXiv:1902.02776 [stat].
Models specified
Vintage	formula = ~Year+AVA
	phi.formula = ~ AVA
	formula_null = ~ AVA
	phi.formula_null = ~ AVA
Precipitation	formula = ~ Precipitation.growing+AVA+Year
	phi.formula = ~ AVA+Year
	formula_null = ~ AVA+Year
	phi.formula_null = ~ AVA+Year
TA	formula = ~ Must_TA+AVA+Year
	phi.formula = ~ AVA+Year
	formula_null = ~ AVA+Year
	phi.formula_null = ~ AVA+Year
pH	formula = ~ Must_pH+AVA+Year
	phi.formula = ~ AVA+Year
	formula_null = ~ AVA+Year
	phi.formula_null = ~ AVA+Year
TSS	formula = ~ Must_TSS+AVA+Year
	phi.formula = ~ AVA+Year
	formula_null = ~ AVA+Year
	phi.formula_null = ~ AVA+Year
Source: Kerri L Steenwerth, Ian A. Morelan, Jungmin Lee, Ruby J. Stahel, Thien P. Nguyen, Rosa Figueroa, Dario Cantu, Jungmin Lee, Ron C. Runnebaum, Amisha T. Poret-Peterson. Fungal and bacterial communities of ‘Pinot noir’ must vary across vintage and growing region. Peer J, submitted 8/2020.

## Sheet: A 16S
Variable	Genus	Coefficient Estimate	Std. Error	t value	p value	q value
Vintage	Tatumella	-1.42354	0.21324	-6.67578	3.90446e-06	8.54297e-05
Vintage	Massilia	2.10691	0.39297	5.36151	5.18048e-05	1.71865e-05
Vintage	Enterobacteriaceae_ASV_17	-0.853805	0.159665	-5.34749	5.33168e-05	0.00147592
Vintage	Komagataeibacter	-1.42896	0.0701742	-20.3631	2.2299e-13	9.30278e-05
Vintage	Pseudomonas	-0.60882	0.0594599	-10.2392	1.09371e-08	0.00396838
Vintage	Enterobacteriaceae_ASV_24	0.37035	0.0328804	11.2635	2.63484e-09	0.0022546
Vintage	Paracoccus	2.21847	0.137658	16.1158	9.86477e-12	2.01463e-08
Vintage	Enterobacteriaceae_ASV_33	-0.962817	0.0621073	-15.5025	1.83341e-11	0.0114855
Vintage	Acinetobacter	-1.62135	0.262178	-6.18417	9.9979e-06	0.000643222
Precipitation	Tatumella	-0.0327516	0.00132822	-24.6582	1.49012e-13	0.00310289
Precipitation	Gluconobacter	0.0271821	0.00907142	2.99646	0.00903771	0.0108758
Precipitation	Sphingomonas	0.0108558	0.0010309	10.5304	2.52091e-08	0.000331341
TA	Tatumella	-1.44853	0.257776	-5.61932	4.88666e-05	0.0317171
pH	Massilia	-6.54767	0.108226	-60.4998	2.44623e-19	0.00024483
pH	Sphingomonas	1.5616	0.154667	10.0965	4.40295e-08	0.0112795
pH	Lactobacillus	-2.98422	0.499102	-5.97917	2.52599e-05	0.0112795
TSS	Sphingomonas	-0.281663	0.0271894	-10.3593	3.13447e-08	0.00047957
TSS	Lactobacillus	-0.0719474	NA	NA	7.99283e-05	0.00047957

## Sheet: B ITS
Variable	Genus	Coefficient Estimate	Std. Error	t value	p value	q value
Vintage	Kazachstania	-1.25121	0.0263827	-47.4255	1.66195e-19	0.000333878
Precipitation	Hanseniaspora	0.0213791	0.00124472	17.1759	2.82814e-11	0.0046738
Precipitation	Erysiphe	-0.0668401	0.00909314	-7.35061	2.40349e-06	1.16926e-08
Precipitation	Alternaria	-0.0150231	0.00293062	-5.12626	0.000124119	0.00873815
pH	Hanseniaspora	-5.20913	0.10739	-48.5066	6.61989e-18	0.00234295
pH	Lachancea	6.10031	0.116594	52.3211	2.14016e-18	0.00318535
pH	Udeniomyces	-4.99783	1.23433	-4.04904	0.00104935	0.0146731
pH	Torulaspora	-2.47252	0.555768	-4.44883	0.000468806	0.0146731
TSS	Hanseniaspora	-0.534686	0.0330906	-16.1582	6.76317e-11	0.00781547
